# Supplementary material for: Application of an online ion chromatography-based instrument for gradient flux measurements of speciated nitrogen and sulfur
Source: Copernicus journal article supplement (doi:10.5194/amt-2016-4), 2016-01-22
Supplement: Supplementary file 1 [file amt-2016-4-supplement.pdf]

1  
2  
3  
4  
5  
6  
7  
8  
9  
10  
11  
12  
13  
14  
15  
16  
17  
18  
19  
20  
21  
22  
23  
24  
25  
26  
27  
28  
29  
30  
31  
32  
33

*Supporting Information for:*

**Application of an online ion chromatography-based instrument for gradient flux measurements of speciated nitrogen and sulfur**

Ian C. Rumsey<sup>1</sup>, John T. Walker<sup>2</sup>

*<sup>1</sup> Department of Physics and Astronomy, College of Charleston,  
Charleston, South Carolina, 29401, U.S.A.*

*<sup>2</sup>Office of Research and Development, U.S. Environmental Protection Agency,  
Research Triangle Park, North Carolina, 27711, U.S.A.*

**Contents**

Solutions used in MARGA ion chromatography system..... S2  
Additional information on external standard liquid solutions ..... S4  
Additional information for the methodology used to determine the detection limit ..... S5  
Results and analysis of Dunn’s test and Brown Forsythe test ..... S7  
Additional analysis of the detection limits in comparison to previous studies..... S9  
Supporting Information Tables and Figures ..... S11  
Supporting Information References ..... S22

## 34 **Solutions used in MARGA ion chromatography system**

35 The MARGA system requires the following chemicals: absorbance solution, internal  
36 standard solution, ion chromatography (IC) eluents, and suppressor regenerant. All chemicals are  
37 prepared with 18.2 M $\Omega$ .cm double deionized (DDI) water.

38 The absorbance solution serves as the medium for gases to diffuse into in the WRD and  
39 to supersaturate the SJAC to allow particles to grow and thus produce a condensate of water  
40 soluble aerosol. It is also used as a carrier liquid to allow the sample to flow through the  
41 MARGA system. Absorption solution is made in batches of 20 L using DDI water. Additionally,  
42 to prevent the growth of bacteria in the MARGA system, 10 ppm hydrogen peroxide (0.7 mL of  
43 30% H<sub>2</sub>O<sub>2</sub>) is added to the absorbance solution. During continuous operation, the MARGA  
44 requires 5 L of absorption solution per day. The absorption solution is replenished (~ 35 L)  
45 weekly.

46 As the WRD and SJAC samples are injected from the syringes to the detector box, the  
47 sample is automatically mixed with an internal standard that contains a known concentration of  
48 lithium bromide (LiBr). The making of the lithium bromide solution requires two steps. First, a  
49 stock solution is prepared by dissolving 4000 mg of LiBr (6.94% Li, 79.90% Br) in a 1 L  
50 volumetric flask, yielding concentrations of 320 mg L<sup>-1</sup> Li and 3680 mg L<sup>-1</sup> Br. This stock is  
51 stable for at least 12 months, if stored away from light and refrigerated. Internal standard stock  
52 solution (5.6 mL) is then injected into a 5 L container using a pipette. The container is then filled  
53 up with DDI water to a weight of 5600 g. This gives final concentrations of 320  $\mu$ g L<sup>-1</sup> for Li and  
54 3680  $\mu$ g L<sup>-1</sup> for Br. The Li and Br internal standard concentrations were verified by an  
55 independent IC system. Stocks are prepared from NIST-traceable LiBr standards (Fisher  
56 Scientific, Pittsburgh, PA). The internal standard is replenished bimonthly.

57           Separate eluents are needed for both the cation and anion ICs. The cation eluent is  
58 prepared by injecting 2.08 mL of pure methanesulfonic acid (MSA) into a 10 L container, which  
59 is filled with 10 kg of DDI water. This yields a final MSA concentration of 3.2 mmol L<sup>-1</sup>. The  
60 anion eluent is prepared by adding 8.68 g of sodium carbonate monohydrate and 6.72 g of  
61 anhydrous sodium bicarbonate to 10 kg DDI water, which yields a final concentration of 7.0  
62 mmol for sodium carbonate and 8 mmol of sodium bicarbonate. Eluents are prepared from  
63 certified chemicals (Fisher Scientific, Pittsburgh, PA). Eluents are replenished biweekly.

64           To further improve the sensitivity of the anion IC, a suppressor regenerant is used. This  
65 chemical improves sensitivity by suppressing eluent background conductivity. An ion-exchange  
66 unit is regenerated before each analysis with phosphoric acid. The phosphoric acid in the ion-  
67 exchange unit is then rinsed by anion eluent. The suppressor regenerant is made by combining 5  
68 kg of DDI water and 125 mL of 85% phosphoric acid (H<sub>3</sub>PO<sub>4</sub>) in a 5-L container, giving a final  
69 concentration of 0.35 mol L<sup>-1</sup> of H<sub>3</sub>PO<sub>4</sub>. The regenerant is made from a certified phosphoric acid  
70 stock (Fisher Scientific, Pittsburgh, PA). Regenerant is replenished bimonthly.

71

72

73

74

75

76

77

78 **Additional information on external standard liquid solutions**

79 External standard liquid solutions were made by dissolving chemicals using 18.2 MΩ.cm  
80 double deionized (DDI) water. The chemicals used were ammonium nitrate (NH<sub>4</sub>NO<sub>3</sub>) (Fisher  
81 Scientific, Pittsburgh, PA), ammonium sulfate ((NH<sub>4</sub>)<sub>2</sub>SO<sub>4</sub>) (Fisher Scientific, Pittsburgh, PA),  
82 potassium chloride (KCl) (Fisher Scientific, Pittsburgh, PA), sodium nitrate (NaNO<sub>3</sub>) (Fluka, St.  
83 Louis, MO), and magnesium sulfate heptahydrate (MgSO<sub>4</sub> 7H<sub>2</sub>O) (Fluka, St. Louis, MO). All  
84 chemicals were ACS (American Chemical Society) grade. Each external standard solution was  
85 diluted to the desired concentration using 18.2 MΩ.cm double deionized (DDI) water.

86

87

88

89

90

91

92

93

94

95

96

97

98 **Additional information on methodology used to determine detection limit**

99           The traditional approach used to determine the detection limit involves combining data  
100 from all analytical channels (in this study, there are four different channels including denuder  
101 and SJAC samples from both sample boxes) into a single data set. From this single data set, the  
102 standard deviation and number of analyses are used to determine the detection limit. The  
103 advantage of this approach is that, for an experiment of given duration, a larger number of  
104 observation (i.e., degrees of freedom) are available to calculate the detection limit. However,  
105 with this approach it is unknown whether the detection limit is strictly a function of the analytical  
106 core of the system or is a combination of the analytical and sampling components of the system.  
107 In other words, the standard deviation may reflect a combination of random error plus systematic  
108 error between channels. To investigate this possibility, the traditional detection limit approach  
109 was conducted in conjunction with the Dunn's test (Dunn, 1964) and the Brown-Forsythe test  
110 (Brown and Forsythe, 1974) to compare channels. The Dunn's test and the Brown-Forsythe test  
111 are non-parametric tests that can be used to determine if there are significant differences in the  
112 median concentrations (Dunn's test) and variance (Brown-Forsythe test) across channels. In  
113 further detail, the Dunn's test (Dunn, 1964) is a non-parametric statistical test of the difference in  
114 medians among multiple groups. It is a rank-sum type test in which the null hypothesis is that the  
115 probability of observing a randomly selected value from the one group that is larger than a  
116 randomly selected value from another group equals one half. Dunn's test is appropriate for  
117 comparing multiple groups consisting of continuous data. In this case, Dunn's test is used to  
118 assess whether the differences in analytical detection limits calculated for individual MARGA  
119 channels (Denuder1, Denuder2, SJAC1, SJAC2) are at least partially the result of systematic  
120 differences (bias) among the channels. The Brown-Forsythe test (Brown and Forsythe, 1974) is a

121 non-parametric statistical test for the equality of variances among multiple groups. For each  
122 observation, a transformation ( $z$ ) is calculated as its deviation from the corresponding group  
123 median. A one-way analysis of variance (ANOVA) is performed on  $z$ , in which the F statistic  
124 represents the Brown-Forsythe test statistic. In this case, the Brown-Forsythe test is used to  
125 assess whether the differences in analytical detection limits calculated for individual MARGA  
126 channels (Denuder1, Denuder2, SJAC1, SJAC2) are at least partially the result of differences in  
127 precision (variance) among the channels.

128

129

130

131

132

133

134

135

136

137

138

139

140

141 **Results and analysis of Dunn’s test and Brown-Forsythe’s test**

142 The results of the Dunn’s test and Brown-Forsythe test for each analyte are presented in Table  
 143 S1.

144 Table S1. Results of the Dunn’s test (DU) and Brown-Forsythe test (BF) for individual MARGA  
 145 channels. Top row indicates channels being compared: S1 = SJAC Sample Box 1, D1 =  
 146 Denuder Sample Box 1, etc. For the Brown-Forsythe test, p values are reported with bold  
 147 indicating statistical significance at the 10% level. For Dunn’s test, N and D indicated not  
 148 significantly different versus significantly different, respectively.

|     |                                | S1-S2 | S1-D1       | S1-D2       | S2-D1       | S2-D2       | D1-D2       |          |
|-----|--------------------------------|-------|-------------|-------------|-------------|-------------|-------------|----------|
| 150 | NO <sub>3</sub> <sup>-</sup>   | DU    | N           | N           | N           | N           | N           |          |
|     |                                | BF    | <b>0.09</b> | 0.86        | 0.45        | <b>0.08</b> | <b>0.04</b> | 0.60     |
| 151 | SO <sub>4</sub> <sup>2-a</sup> | DU    | N           | <b>D</b>    | <b>D</b>    | <b>D</b>    | <b>D</b>    | N        |
|     |                                | BF    | 0.80        | 0.18        | 0.24        | 0.29        | 0.38        | 0.88     |
| 152 | SO <sub>4</sub> <sup>2-</sup>  | DU    | N           | <b>D</b>    | <b>D</b>    | <b>D</b>    | <b>D</b>    | N        |
|     |                                | BF    | 0.80        | 0.18        | 0.24        | 0.29        | 0.38        | 0.88     |
| 153 | NH <sub>4</sub> <sup>+</sup>   | DU    | N           | N           | <b>D</b>    | N           | <b>D</b>    | <b>D</b> |
|     |                                | BF    | 0.71        | <b>0.04</b> | <b>0.01</b> | <b>0.10</b> | <b>0.02</b> | 0.35     |
| 154 | Na <sup>+</sup>                | DU    | N           | <b>D</b>    | <b>D</b>    | <b>D</b>    | N           | N        |
|     |                                | BF    | 0.86        | 0.48        | 0.84        | 0.65        | 0.97        | 0.70     |
| 155 | Na <sup>+</sup>                | DU    | N           | N           | N           | N           | N           | N        |
|     |                                | BF    | 0.28        | 0.15        | 0.22        | <b>0.02</b> | <b>0.05</b> | 0.89     |
| 156 | K <sup>+</sup>                 | DU    | N           | N           | N           | N           | N           | N        |
|     |                                | BF    | 0.19        | 0.85        | 0.72        | 0.26        | 0.35        | 0.87     |

159 <sup>a</sup> Detection limits for SO<sub>4</sub><sup>2-</sup> and Na<sup>+</sup> were determined using two liquid standards with different concentrations.  
 160

161 The results of Dunn’s test and Brown-Forsythe test (Table S1) indicate that the sampling  
 162 components of the MARGA are influencing the detection limit of all the compounds except K<sup>+</sup>.  
 163 The influence of the sampling components of the MARGA on the detection limit varies from  
 164 compound to compound. In both SO<sub>4</sub><sup>2-</sup> detection limit analyses there were multiple channels that  
 165 had significant differences in median concentrations. For NO<sub>3</sub><sup>-</sup>, the detection limit was not  
 166 influenced by differences in channel medians, but was influenced by differences in the channel  
 167 variance with three of the six channel to channel comparisons having a Brown-Forsythe p-value  
 168 less than 0.10. It is not known what is causing the significant differences in channel variance, but

169 it is hypothesized that inconsistency in peak integration may be an issue. Differences in channel  
170 median concentrations and/or concentration variance also influenced the determined detection  
171 limit for  $\text{Na}^+$  and  $\text{NH}_4^+$ . It can therefore be concluded that analytical detection limits calculated  
172 by combining channels is function of variability related to random error in individual channels,  
173 systematic differences across channels, and differences in variance across channels.



174 **Additional analysis of the detection limits in comparison to previous studies**

175 Thomas et al. (2009) and Wolff et al. (2010) determined detection limits in field  
 176 conditions using the GRAEGOR system, which is quasi-similar to the MARGA system.  
 177 However, they used different methodologies to determine their detection limit. Therefore, in  
 178 order to make an equivalent comparison, the detection limits were also calculated for this study  
 179 using the Thomas et al. (2009) and Wolff et al. (2010) detection limit methodologies. Thomas et  
 180 al. (2009) calculated average blanks using average blank values plus three standard deviations of  
 181 the blank value, whereas Wolff et al. (2010) used three standard deviations of the blank value.  
 182 The results are shown in Table S2.

183  
 184 Table S2. Calculate detection limits from this study using different methodologies

|                     | Detection limit calculation for data in this study using different methodologies ( $\mu\text{g m}^{-3}$ ) |                      |                     | Previous studies detection limits ( $\mu\text{g m}^{-3}$ ) |       |                     |       |
|---------------------|-----------------------------------------------------------------------------------------------------------|----------------------|---------------------|------------------------------------------------------------|-------|---------------------|-------|
|                     | This study                                                                                                | Thomas et al. (2009) | Wolff et al. (2010) | Thomas et al. (2009)                                       |       | Wolff et al. (2010) |       |
|                     |                                                                                                           |                      |                     | MPIC                                                       | CEH   | NEU                 | EGER  |
| $\text{NO}_3^-$     | 0.056                                                                                                     | 0.066                | 0.065               | 0.077                                                      | 0.150 | 0.093               | 0.130 |
| $\text{HNO}_3$      | 0.057                                                                                                     | 0.066                | 0.066               | 0.079                                                      | 0.191 | 0.094               | 0.132 |
| $\text{SO}_4^{2-a}$ | 0.048                                                                                                     | 0.093                | 0.056               | 0.201                                                      | 0.116 | -                   | -     |
| $\text{SO}_2$       | 0.032                                                                                                     | 0.073                | 0.037               | 0.123                                                      | 0.254 | -                   | -     |
| $\text{SO}_4^{2-}$  | 0.064                                                                                                     | 0.112                | 0.075               | -                                                          | -     | -                   | -     |
| $\text{SO}_2$       | 0.043                                                                                                     | 0.086                | 0.050               | -                                                          | -     | -                   | -     |
| $\text{NH}_4^+$     | 0.021                                                                                                     | 0.025                | 0.025               | 0.117                                                      | 0.180 | 0.074               | 0.022 |
| $\text{NH}_3$       | 0.020                                                                                                     | 0.024                | 0.023               | 0.111                                                      | 0.161 | 0.055               | 0.021 |
| $\text{Na}^+$       | 0.029                                                                                                     | 0.030                | 0.030               | -                                                          | -     | -                   | -     |
| $\text{Na}^+$       | 0.026                                                                                                     | 0.033                | 0.033               | -                                                          | -     | -                   | -     |
| $\text{K}^+$        | 0.038                                                                                                     | 0.038                | 0.045               | -                                                          | -     | -                   | -     |

185  
 186 In summary, regardless of the detection limit methodology, the detection limits determined in  
 187 this study are lower than those determined by Thomas et al. (2009) and Wolff et al. (2010) for all  
 188 nitrogen and sulfur compounds with the exception of  $\text{NH}_3$ .  $\text{NH}_3$  detection limits determined in

189 this study are lower than those reported by Thomas et al. (2009) and Wolff et al. (2010) at the  
190 grassland NEU site, but similar to those reported by Wolff et al. (2010) at the forest (EGER) site.

191  
192  
193  
194  
195  
196  
197  
198  
199  
200  
201  
202  
203  
204  
205  
206  
207  
208  
209  
210  
211  
212  
213  
214  
215  
216

217 **Supplementary Tables and Figures**

218 Table S3. MARGA blank concentrations expressed as equivalent air concentration for each  
 219 sample box (SB).

|     | Blank concentration ( $\mu\text{g m}^{-3}$ ) |                    |                    |               |                 |               |               |              |
|-----|----------------------------------------------|--------------------|--------------------|---------------|-----------------|---------------|---------------|--------------|
|     | $\text{NO}_3^-$                              | $\text{HNO}_3$     | $\text{SO}_4^{2-}$ | $\text{SO}_2$ | $\text{NH}_4^+$ | $\text{NH}_3$ | $\text{Na}^+$ | $\text{K}^+$ |
| 220 |                                              |                    |                    |               |                 |               |               |              |
| 221 |                                              |                    |                    |               |                 |               |               |              |
| 222 | SB1                                          | 0.001 <sup>a</sup> | 0                  | 0.040         | 0.037           | 0             | 0             | 0            |
| 223 |                                              | 0.006 <sup>b</sup> | 0.003              | 0.013         | 0.012           | 0             | 0             | 0            |
| 224 |                                              | 33 <sup>c</sup>    | 37                 | 33            | 37              | 33            | 37            | 37           |
| 225 | SB2                                          | 0.001              | 0                  | 0.034         | 0.035           | 0             | 0.001         | 0            |
| 226 |                                              | 0.003              | 0.001              | 0.015         | 0.011           | 0             | 0.005         | 0            |
| 227 |                                              | 37                 | 35                 | 37            | 35              | 37            | 35            | 35           |

228 <sup>a</sup> Mean concentration  
 229 <sup>b</sup>  $\pm$  1 standard deviation  
 230 <sup>c</sup> Number of observations

231  
 232  
 233  
 234  
 235  
 236  
 237  
 238  
 239  
 240  
 241  
 242  
 243  
 244  
 245  
 246  
 247  
 248

249 Table S4. Orthogonal least squares regression coefficients comparing SB1 (x) to SB2 (y).  
 250 Results are reported for individual colocation experiments during June-July (Period 1), August  
 251 (Period 2), and October, 2012 (Period 3). Number of hourly observations for each period are  
 252 approximately 87, 138, and 73, respectively.

| Period                        | 1     | 2     | 3     | 1     | 2         | 3     |
|-------------------------------|-------|-------|-------|-------|-----------|-------|
|                               | ----- | Slope | ----- | ----- | Intercept | ----- |
| NH <sub>3</sub>               | 0.94  | 1.03  | 0.95  | -0.10 | -0.01     | -0.08 |
| NH <sub>4</sub> <sup>+</sup>  | 1.06  | 1.01  | 1.02  | -0.03 | -0.01     | -0.01 |
| HNO <sub>3</sub>              | 0.86  | 1.02  | 1.00  | 0.05  | -0.02     | -0.01 |
| NO <sub>3</sub> <sup>-</sup>  | 0.87  | 1.06  | 1.03  | 0.02  | -0.02     | 0.01  |
| SO <sub>2</sub>               | 0.97  | 1.04  | 1.03  | -0.02 | -0.01     | -0.05 |
| SO <sub>4</sub> <sup>2-</sup> | 1.02  | 0.99  | 1.01  | 0.09  | 0.05      | 0.01  |

253  
 254  
 255  
 256  
 257  
 258  
 259  
 260  
 261  
 262  
 263  
 264  
 265  
 266  
 267  
 268  
 269  
 270  
 271

272 Table S5. HNO<sub>3</sub> and NO<sub>3</sub><sup>-</sup> external standard runs and the difference between expected and  
 273 observed concentration.

|                              | SB1 concentrations (µg m <sup>-3</sup> ) |                  |                                     | SB2 concentrations (µg m <sup>-3</sup> ) |       |                        |
|------------------------------|------------------------------------------|------------------|-------------------------------------|------------------------------------------|-------|------------------------|
|                              | Exp <sup>a</sup>                         | Obs <sup>b</sup> | Difference <sup>c</sup><br>(offset) | Exp                                      | Obs   | Difference<br>(offset) |
|                              | 0                                        | 0                | 0                                   | 0                                        | 0     | 0                      |
| HNO <sub>3</sub>             | 0.133                                    | 0.192            | 0.060                               | 0.128                                    | 0.181 | 0.053                  |
|                              | 0.380                                    | 0.528            | 0.149                               | 0.366                                    | 0.502 | 0.136                  |
|                              | 1.345                                    | 1.523            | 0.178                               | 1.303                                    | 1.479 | 0.176                  |
|                              | 2.302                                    | 2.483            | 0.181                               | 2.219                                    | 2.404 | 0.186                  |
|                              | 0                                        | 0.001            | 0.001                               | 0                                        | 0.001 | 0.001                  |
| NO <sub>3</sub> <sup>-</sup> | 0.131                                    | 0.186            | 0.05                                | 0.126                                    | 0.183 | 0.057                  |
|                              | 0.374                                    | 0.518            | 0.144                               | 0.360                                    | 0.488 | 0.128                  |
|                              | 1.324                                    | 1.487            | 0.163                               | 1.283                                    | 1.435 | 0.153                  |
|                              | 2.266                                    | 2.438            | 0.172                               | 2.184                                    | 2.369 | 0.185                  |

274 <sup>a</sup> Expected concentration.

275 <sup>b</sup> Observed concentration.

276 <sup>c</sup> Difference between expected and observed concentration (i.e. observed concentration minus expected  
 277 concentration).

278

279

280

281

282

283

284

285

286

287

288

289

290

291

292

293

294 Table S6. Detection limit results for individual MARGA channels.

|                                |                                                        | Exp conc <sup>b</sup><br>( $\mu\text{g L}^{-1}$ ) | Median Obs <sup>c</sup><br>( $\mu\text{g L}^{-1}$ ) | St Dev <sup>d</sup><br>( $\mu\text{g L}^{-1}$ ) | N <sup>e</sup> | T-stat | Liq Conc DL<br>( $\mu\text{g L}^{-1}$ ) | Air Conc DL<br>( $\mu\text{g m}^{-3}$ ) |
|--------------------------------|--------------------------------------------------------|---------------------------------------------------|-----------------------------------------------------|-------------------------------------------------|----------------|--------|-----------------------------------------|-----------------------------------------|
| NO <sub>3</sub> <sup>-</sup>   | D1                                                     |                                                   | 7.64                                                | 0.76                                            | 19             | 1.33   | 2.02                                    | 0.050                                   |
|                                | D2                                                     | 5.34                                              | 8.05                                                | 0.65                                            | 14             | 1.35   | 1.76                                    | 0.044                                   |
|                                | S1                                                     |                                                   | 7.60                                                | 0.75                                            | 19             | 1.33   | 2.00                                    | 0.050                                   |
|                                | S2                                                     |                                                   | 7.89                                                | 1.14                                            | 20             | 1.33   | 3.03                                    | 0.076                                   |
|                                | Average NO <sub>3</sub> <sup>-</sup> /HNO <sub>3</sub> |                                                   |                                                     |                                                 |                |        |                                         | <b>2.20</b>                             |
| SO <sub>4</sub> <sup>2-a</sup> | D1                                                     |                                                   | 2.15                                                | 0.74                                            | 37             | 1.31   | 1.93                                    | 0.048                                   |
|                                | D2                                                     | 0.00                                              | 2.05                                                | 0.70                                            | 35             | 1.31   | 1.83                                    | 0.046                                   |
|                                | S1                                                     |                                                   | 1.65                                                | 0.54                                            | 33             | 1.31   | 1.41                                    | 0.035                                   |
|                                | S2                                                     |                                                   | 1.49                                                | 0.62                                            | 37             | 1.31   | 1.62                                    | 0.040                                   |
|                                | Average SO <sub>4</sub> <sup>2-</sup> /SO <sub>2</sub> |                                                   |                                                     |                                                 |                |        |                                         | <b>1.70</b>                             |
| SO <sub>4</sub> <sup>2-</sup>  | D1                                                     |                                                   | 26.40                                               | 0.63                                            | 19             | 1.33   | 1.68                                    | 0.042                                   |
|                                | D2                                                     | 19.47                                             | 27.06                                               | 0.98                                            | 14             | 1.35   | 2.65                                    | 0.066                                   |
|                                | S1                                                     |                                                   | 27.39                                               | 1.08                                            | 19             | 1.33   | 2.87                                    | 0.072                                   |
|                                | S2                                                     |                                                   | 25.92                                               | 0.63                                            | 20             | 1.33   | 1.67                                    | 0.042                                   |
|                                | Average SO <sub>4</sub> <sup>2-</sup> /SO <sub>2</sub> |                                                   |                                                     |                                                 |                |        |                                         | <b>2.21</b>                             |
| NH <sub>4</sub> <sup>+</sup>   | D1                                                     |                                                   | 5.11                                                | 0.26                                            | 19             | 1.33   | 0.69                                    | 0.017                                   |
|                                | D2                                                     | 4.91                                              | 5.51                                                | 0.33                                            | 14             | 1.35   | 0.89                                    | 0.022                                   |
|                                | S1                                                     |                                                   | 4.93                                                | 0.17                                            | 20             | 1.33   | 0.45                                    | 0.011                                   |
|                                | S2                                                     |                                                   | 4.91                                                | 0.19                                            | 20             | 1.33   | 0.50                                    | 0.013                                   |
|                                | Average NH <sub>4</sub> <sup>+</sup> /NH <sub>3</sub>  |                                                   |                                                     |                                                 |                |        |                                         | <b>0.63</b>                             |
| Na <sup>+</sup>                | D1                                                     |                                                   | 1.63                                                | 0.49                                            | 19             | 1.33   | 1.30                                    | 0.033                                   |
|                                | D2                                                     | 1.75                                              | 1.53                                                | 0.45                                            | 14             | 1.35   | 1.22                                    | 0.030                                   |
|                                | S1                                                     |                                                   | 1.39                                                | 0.35                                            | 20             | 1.33   | 0.93                                    | 0.023                                   |
|                                | S2                                                     |                                                   | 1.42                                                | 0.45                                            | 20             | 1.33   | 1.19                                    | 0.030                                   |
|                                | Average                                                |                                                   |                                                     |                                                 |                |        |                                         | <b>1.16</b>                             |
| Na <sup>+</sup>                | D1                                                     |                                                   | 7.25                                                | 0.28                                            | 20             | 1.33   | 0.74                                    | 0.019                                   |
|                                | D2                                                     | 5.00                                              | 7.16                                                | 0.20                                            | 21             | 1.33   | 0.53                                    | 0.013                                   |
|                                | S1                                                     |                                                   | 7.03                                                | 0.44                                            | 18             | 1.33   | 1.17                                    | 0.029                                   |
|                                | S2                                                     |                                                   | 7.01                                                | 0.54                                            | 21             | 1.33   | 1.43                                    | 0.036                                   |
|                                | Average                                                |                                                   |                                                     |                                                 |                |        |                                         | <b>0.97</b>                             |
| K <sup>+</sup>                 | D1                                                     |                                                   | 5.14                                                | 0.64                                            | 20             | 1.33   | 1.70                                    | 0.042                                   |
|                                | D2                                                     | 4.91                                              | 5.68                                                | 0.58                                            | 21             | 1.33   | 1.54                                    | 0.038                                   |
|                                | S1                                                     |                                                   | 5.03                                                | 0.67                                            | 18             | 1.33   | 1.79                                    | 0.045                                   |
|                                | S2                                                     |                                                   | 5.31                                                | 0.53                                            | 21             | 1.33   | 1.40                                    | 0.033                                   |
|                                | Average                                                |                                                   |                                                     |                                                 |                |        |                                         | <b>1.61</b>                             |

295 <sup>a</sup> Detection limits for SO<sub>4</sub><sup>2-</sup> and Na<sup>+</sup> were determined using two liquid standard with different concentrations.296 <sup>b</sup> Expected concentration.297 <sup>c</sup> Median observed concentration.298 <sup>d</sup>  $\pm$  1 standard deviation.299 <sup>e</sup> Number of observations.

300

301

302

303

304 Table S7. Summary statistics for select meteorological variables, air concentrations, and fluxes during the period 23 September – 14  
 305 October, 2012.

|                   | Meteorology                                |                             |                                     | Concentration<br>( $\mu\text{g m}^{-3}$ ) |                              |                  |                              |                 |                               | Flux<br>( $\text{ng m}^{-2} \text{s}^{-1}$ ) |                              |                  |                              |                 |                               |
|-------------------|--------------------------------------------|-----------------------------|-------------------------------------|-------------------------------------------|------------------------------|------------------|------------------------------|-----------------|-------------------------------|----------------------------------------------|------------------------------|------------------|------------------------------|-----------------|-------------------------------|
|                   | W.S. <sup>c</sup><br>( $\text{m s}^{-1}$ ) | u*<br>( $\text{m s}^{-1}$ ) | Air Temp.<br>( $^{\circ}\text{C}$ ) | NH <sub>3</sub>                           | NH <sub>4</sub> <sup>+</sup> | HNO <sub>3</sub> | NO <sub>3</sub> <sup>-</sup> | SO <sub>2</sub> | SO <sub>4</sub> <sup>2-</sup> | NH <sub>3</sub>                              | NH <sub>4</sub> <sup>+</sup> | HNO <sub>3</sub> | NO <sub>3</sub> <sup>-</sup> | SO <sub>2</sub> | SO <sub>4</sub> <sup>2-</sup> |
| Mean              | 0.8                                        | 0.1                         | 15.9                                | 0.4                                       | 0.7                          | 0.3              | 0.4                          | 0.5             | 1.9                           | 9.1                                          | -1.0                         | -4.3             | -3.1                         | -5.5            | -4.0                          |
| Median            | 0.7                                        | 0.1                         | 15.5                                | 0.3                                       | 0.7                          | 0.2              | 0.3                          | 0.1             | 1.8                           | 3.9                                          | -0.4                         | -1.8             | -1.6                         | -1.9            | -2.4                          |
| S.D. <sup>a</sup> | 0.5                                        | 0.1                         | 5.8                                 | 0.3                                       | 0.3                          | 0.3              | 0.3                          | 1.1             | 0.8                           | 11.7                                         | 2.1                          | 6.4              | 4.3                          | 16.8            | 5.1                           |
| Max.              | 2.4                                        | 0.5                         | 28.7                                | 1.6                                       | 1.5                          | 1.8              | 1.2                          | 8.8             | 4.3                           | 82.8                                         | 6.6                          | 6.6              | 18.1                         | 46.7            | 17.7                          |
| Min.              | 0.0                                        | 0.0                         | 4.4                                 | 0.0                                       | 0.2                          | 0.0              | 0.0                          | 0.0             | 0.5                           | -1.4                                         | -14.6                        | -38              | -35.4                        | -245            | -28.9                         |
| N <sup>b</sup>    | 474                                        | 474                         | 474                                 | 449                                       | 376                          | 451              | 384                          | 451             | 384                           | 406                                          | 358                          | 407              | 366                          | 407             | 366                           |

306 <sup>a</sup> S.D.=  $\pm 1$  standard deviation

307 <sup>b</sup> N = number of observations

308 <sup>c</sup> W.S. = Wind Speed

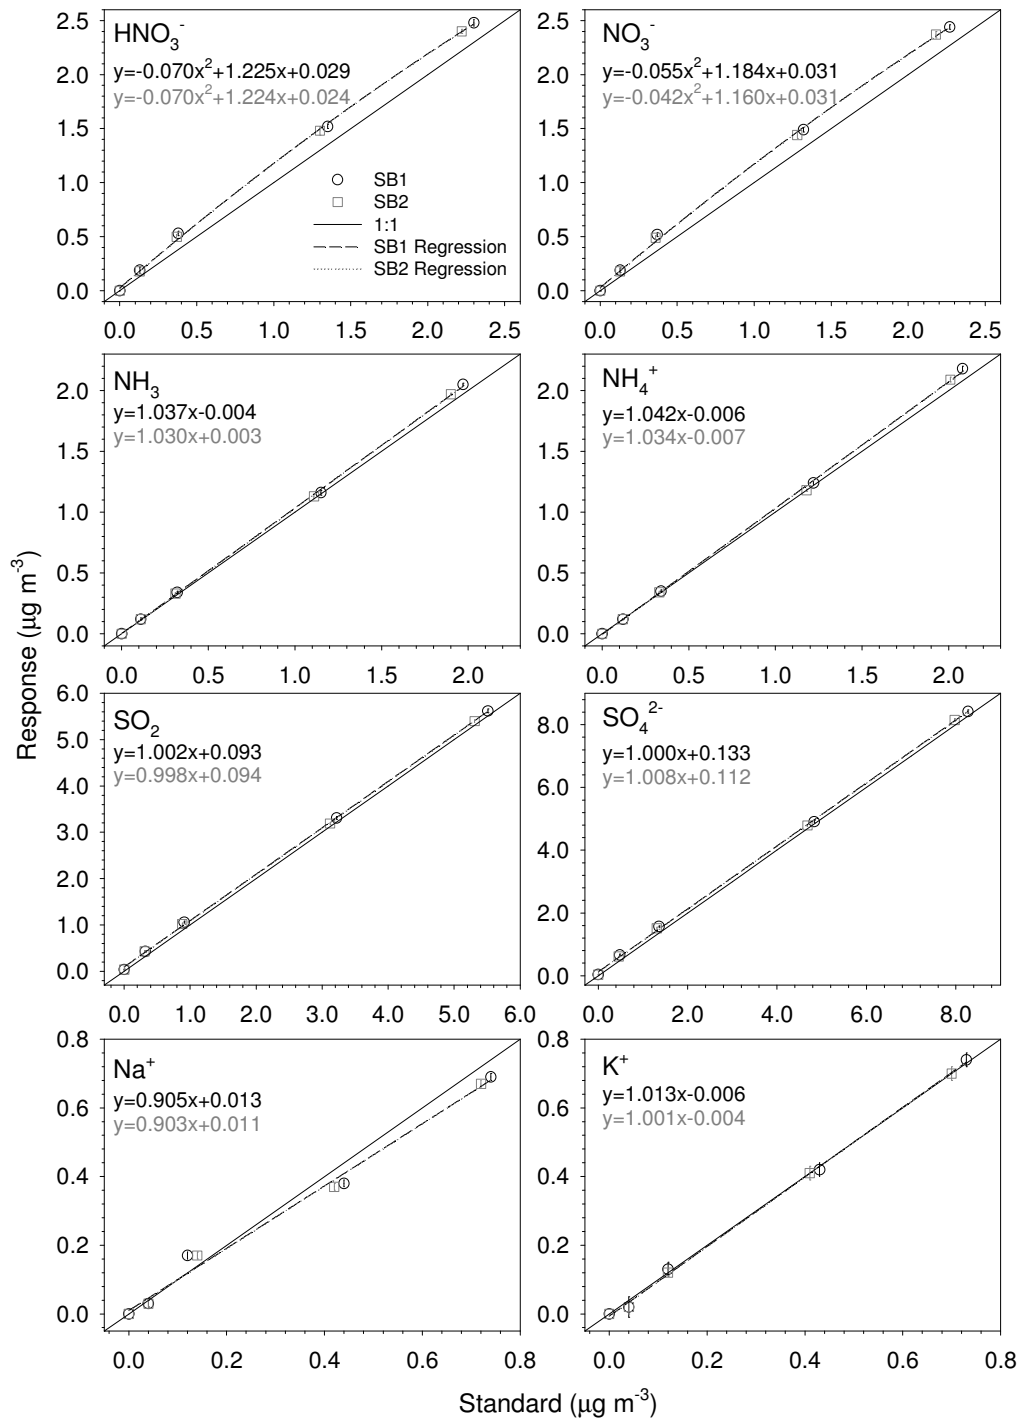

334 Figure S1. Results of external standard tests. Response is given in equivalent air concentration  
 335 ( $\mu\text{g m}^{-3}$ ).

336

337



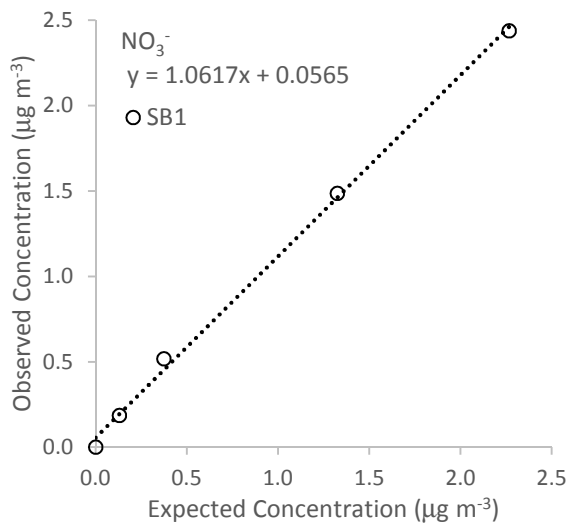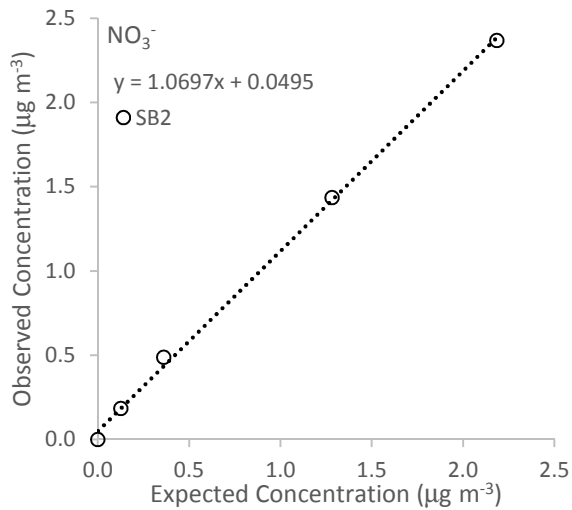

338

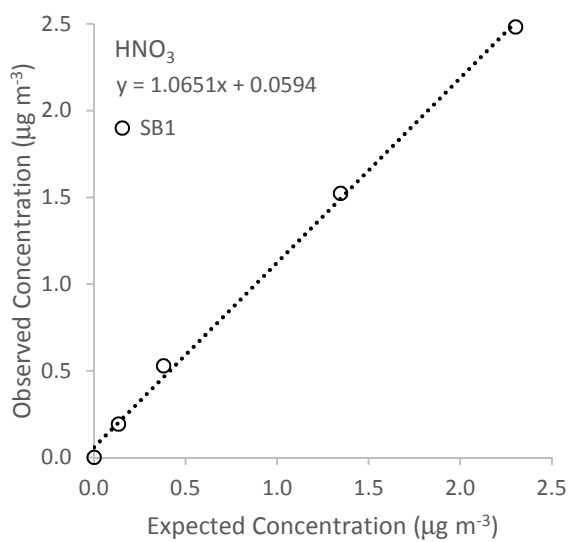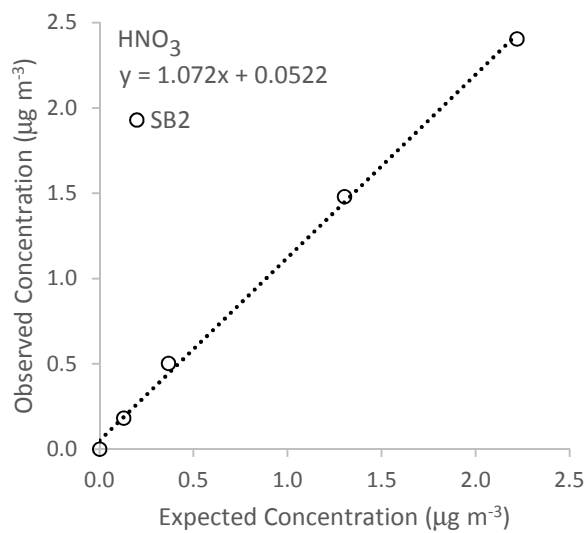

340

341 Figure S2. NO<sub>3</sub><sup>-</sup> linear regression analysis for external standard tests.

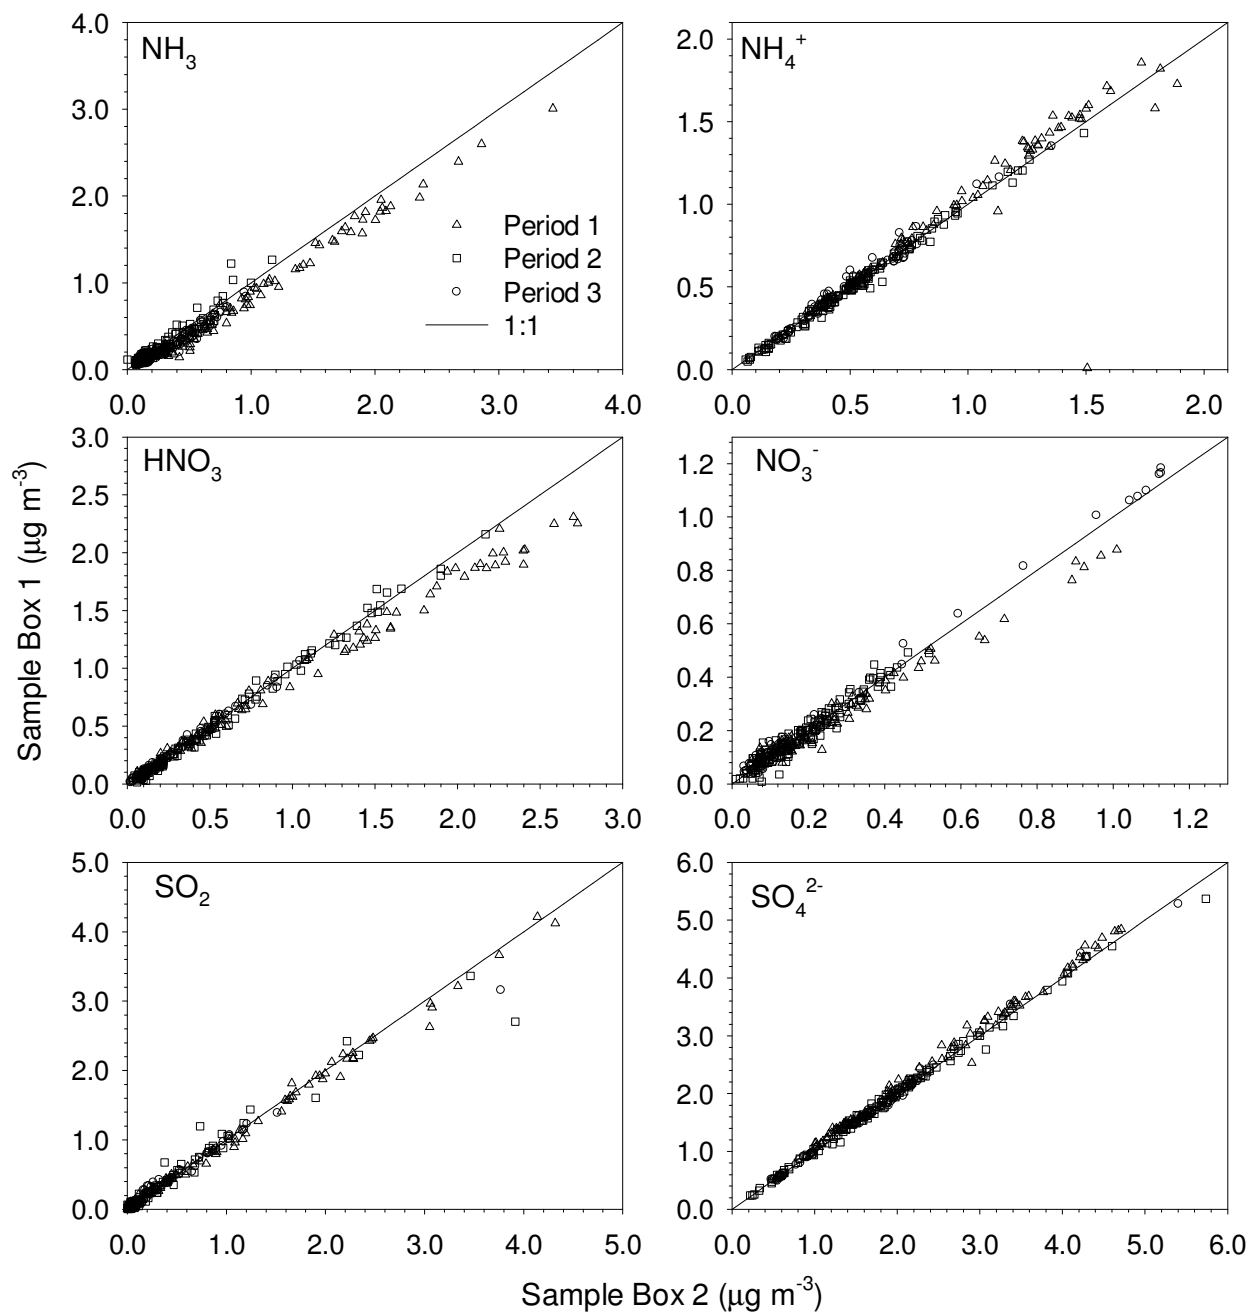

342  
343

344 Figure S3. Scatterplots of concentrations measured by MARGA sample boxes 1 and 2 during  
345 three colocation experiments represented by different symbols (Period 1= June-July 2012; Period  
346 2 =August 2012; Period 3= October 2012)

347  
348  
349

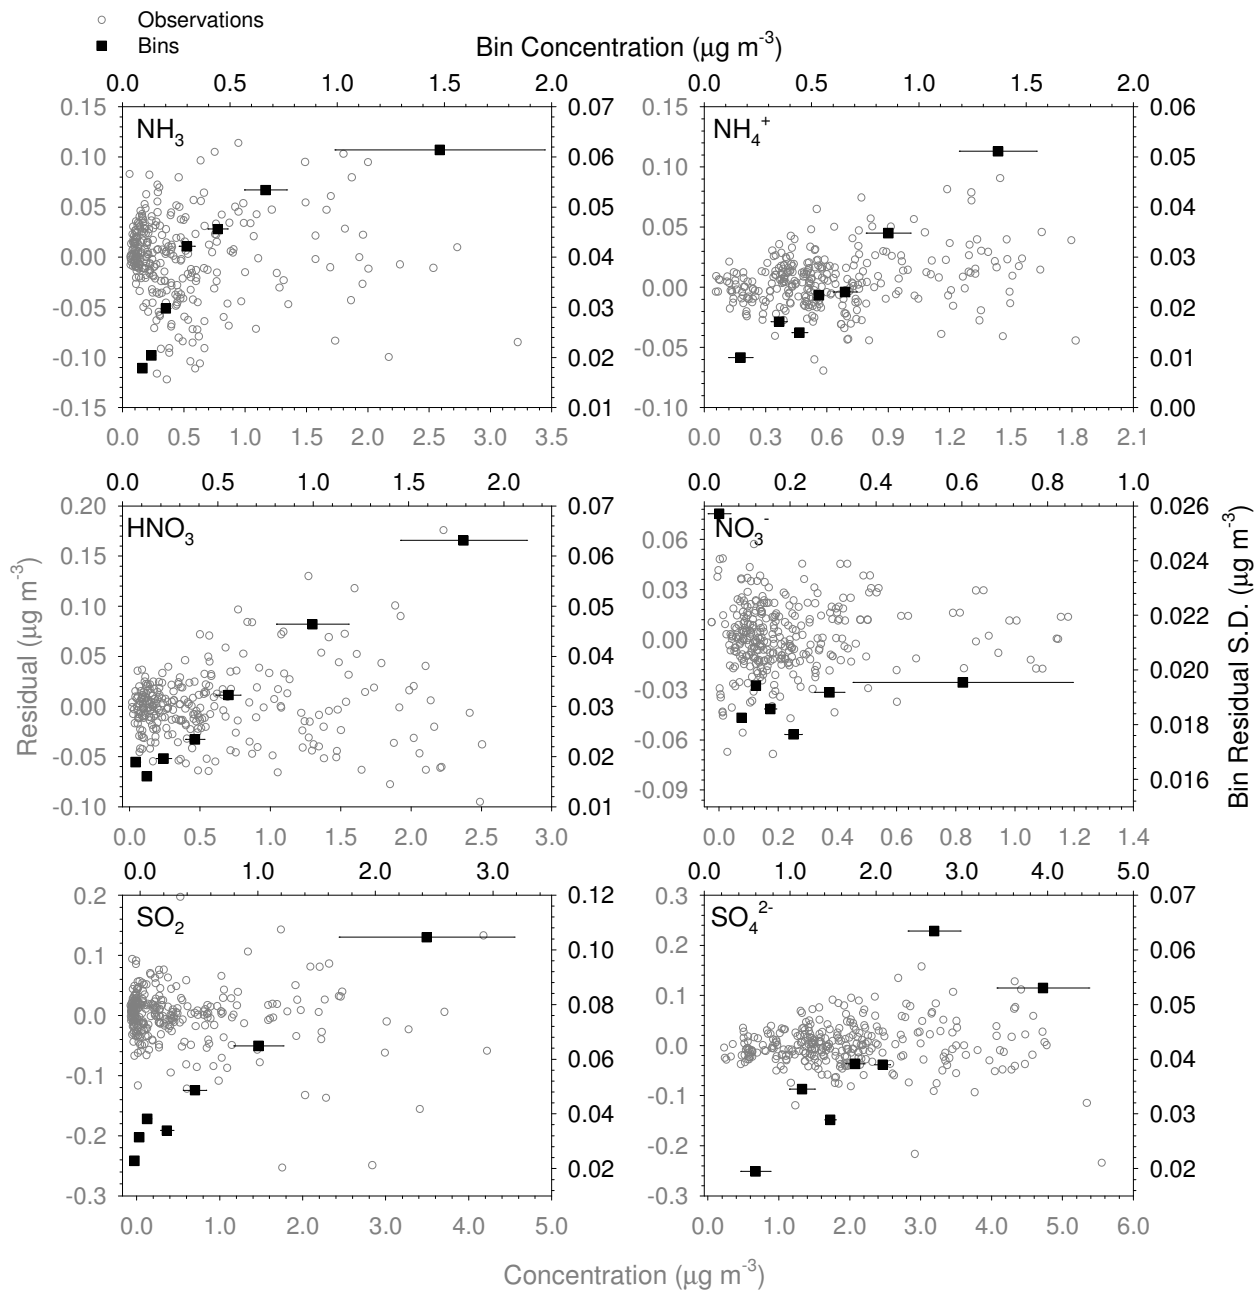

350

351 Figure S4. Scatterplots (gray circles) of orthogonal least squares residuals versus average  
 352 concentration between sample boxes. Data from three colocation experiments are combined.  
 353 Black squares represent binwise standard deviation of residuals versus concentration. Horizontal  
 354 bars represent standard deviation of concentration within bin. Individual bins contain  $\approx 42$   
 355 observations.

356

357

358

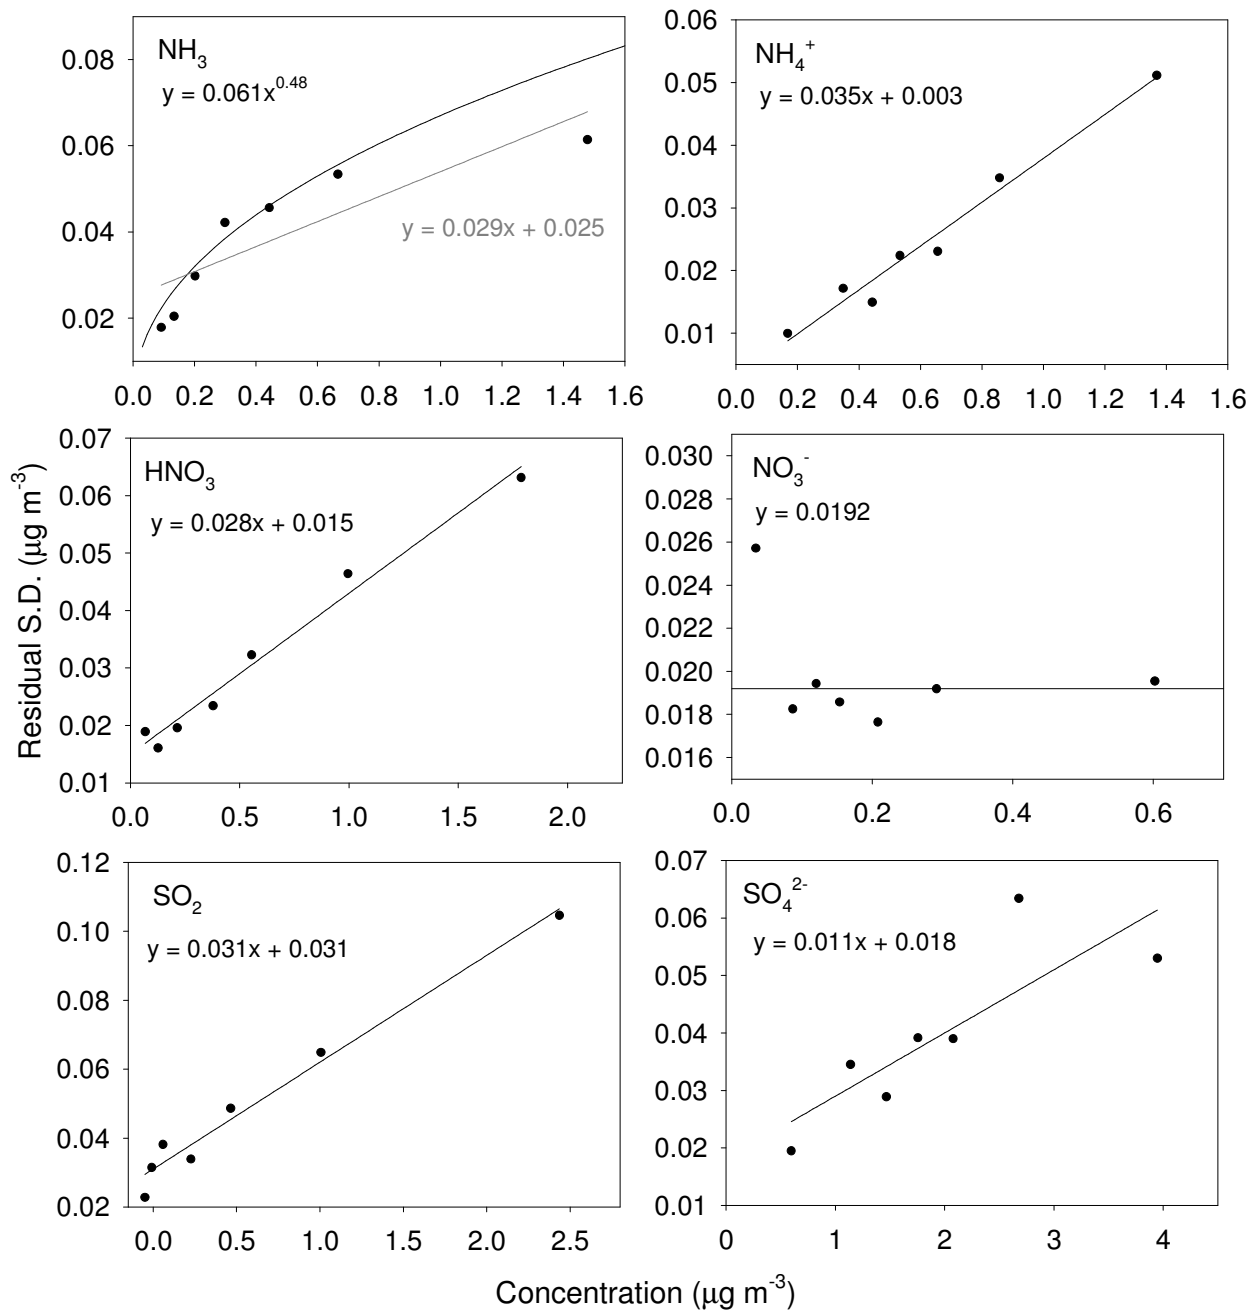

360

361

362 Figure S5. Curves describing relationship between air concentration and the standard deviation  
 363 of orthogonal least squares fits (gradient precision). Data points represent binwise standard  
 364 deviation of residual and corresponding average air concentration. Bins comprise  $\approx 42$   
 365 observations.

366

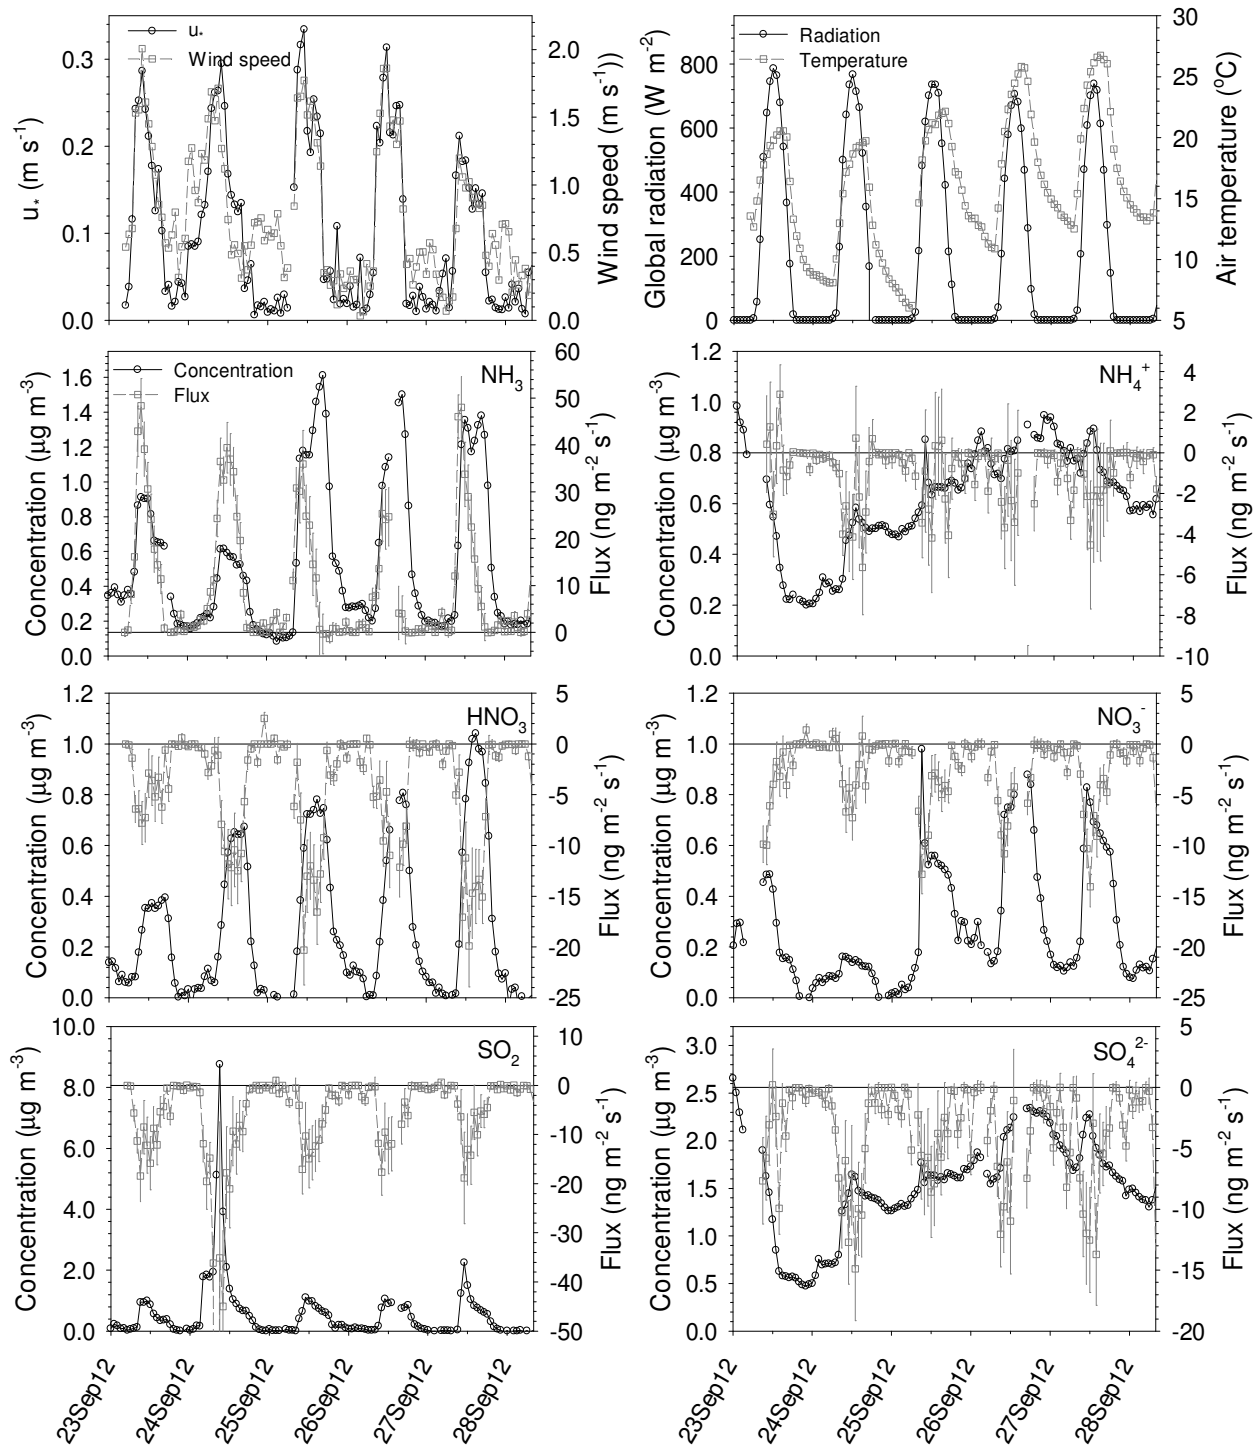

367

368 Figure S6. Example time series of meteorological variables, air concentrations, and fluxes.  
 369 Fluxes also include flux error calculated from equation (4) in the main text. For plots of  
 370 chemical species, concentrations and fluxes are represented by black circles and gray squares,  
 371 respectively.

372 **Supporting Information References**

373 Brown, M.B., Forsythe, A.B. Robust tests for equality of variances. *J. Am. Statist. Assoc.* 69  
374 (346), 364–367, DOI 10.1080/01621459.1974.10482955, 1974.

375  
376 Dunn, O.J. Multiple comparisons using rank sums. *Technometrics* 6 (3), 241-252, DOI  
377 10.1080/00401706.1964.10490181, 1964.

378  
379 Thomas, R.M., Trebs, I., Otjes, R., Jongejan, P.A.C., ten Brink, H., Phillips, G., Kortner, M.,  
380 Meixner, F.X., Nemitz, E. An automated analyzer to measure surface-atmosphere exchange  
381 fluxes of water soluble inorganic aerosol compounds and reactive trace gases. *Environ. Sci.*  
382 *Technol.*, 43 (5), 1412-1418, DOI 10.1021/es8019403, 2009.

383  
384 Wolff, V., Trebs, I., Ammann, C., Meixner, F.X. Aerodynamic gradient measurements of the  
385  $\text{NH}_3\text{-HNO}_3\text{-NH}_4\text{NO}_3$  triad using a wet chemical instrument: an analysis of precision  
386 requirements and flux errors. *Atmos. Meas. Tech.*, 3 (1), 187–208, DOI 10.5194/amt-3-187-  
387 2010, 2010.
